# Supplementary material for: Attractive PH⋯HP interactions revealed by state-of-the-art ab initio calculations
Source: Royal Society of Chemistry journal article supplement (doi:10.1039/c7cp04412g), 2017-01-01
Supplement: c7cp04412g1.pdf [file c7cp04412g1.pdf]

# Attractive P-H...H-P interactions revealed by state-of-the-art *ab initio* calculations

## Supporting Information

Sirous Yourdkhani\*, Mirosław Jabłoński†, Jorge Echeverría‡

September 27, 2017

### Abstract

We report in this work a combined structural and state-of-the-art computational study of homopolar P-H...H-P intermolecular contacts. Databases surveys have shown the abundance of such surprisingly unexplored contacts, which are usually accompanied by other weak interactions in the solid state. By means of a detailed theoretical study utilizing SAPT(DFT), MP2, SCS-MP2, MP2C and CCSD(T) methods and both aug-cc-pVXZ and aug-cc-pCVXZ ( $X = D, T, Q, 5$ ) basis sets as well as extrapolation to the CBS limit, we have shown that P-H...H-P contacts are indeed attractive and considerably strong. SAPT(DFT) calculations have revealed the dispersive nature of the P-H...H-P interaction with only minor contribution of the inductive term, whereas the first-order electrostatic term is clearly overbalanced by the first-order exchange energy. In general the computed interaction energies follow the trend:  $E_{\text{int}}^{\text{MP2C}} \approx E_{\text{int}}^{\text{SCS-MP2}} < E_{\text{int}}^{\text{SAPT(DFT)}} < E_{\text{int}}^{\text{MP2}}$ . Our results have also shown that the aug-cc-pVDZ (or aug-cc-pCVDZ) basis set is not yet well-balanced and that the second-order dispersion energy term is the slowest converging among all SAPT(DFT) energy components. Comparing to aug-cc-pVXZ basis sets, their core-correlation counterparts have a modest influence on all supermolecular interaction energies and a negligible influence on both the SAPT(DFT) interaction energy and its components.

---

\*Department of Chemistry, Tarbiat Modares University, P.O. Box 14115-175, Tehran, Iran

†Department of Quantum Chemistry, Faculty of Chemistry, Nicolaus Copernicus University in Toruń, 7-Gagarina St., 87-100 Toruń, Poland, E-mail: teojab@chem.uni.torun.pl

‡Departament de Química Inorgànica i Orgànica and Institut de Química Teòrica i Computacional (IQTIC-UB), Universitat de Barcelona, Martí i Franquès 1-11, 08028 Barcelona (Spain). E-mail: jorge.echeverria@qi.ub.es

Figure S1: P-H $\cdots$ P (green) and P-H $\cdots$ H-P (red) short contacts in the crystal structure of tetraphosphanylsilane (ICSD Refcode 408432). d1 = 2.97, d2 = 3.05, d3 = 3.19, d4 = 3.12, d5 = 2.52, d6 = 2.55, d7 = 2.12Å.

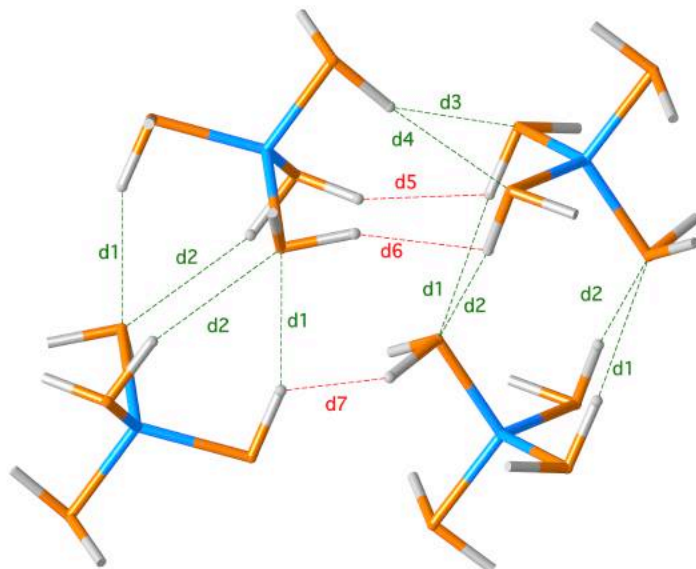

Figure S2: Calculated intermolecular H $\cdots$ H distances as a function of the dissociation energy with (blue line) and without (red line) correction of the BSSE for dimers of PH<sub>3</sub>, PH<sub>2</sub>CH<sub>3</sub> and PH(CH<sub>3</sub>)<sub>2</sub> with topology 1:1 (MP2/aug-cc-pVTZ).

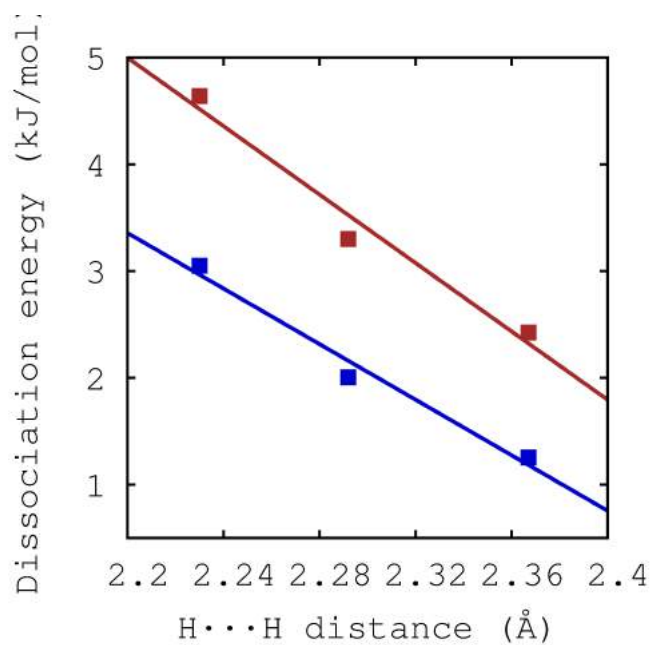

Figure S3: Values (in kJ/mol) of SAPT(DFT) energy components obtained by means of aug-cc-pCVXZ (X = D (1), T (2), Q (3), 5 (4)) basis sets and in the complete basis set limit (5) for dimers of DUCBUA and PH<sub>3</sub>.

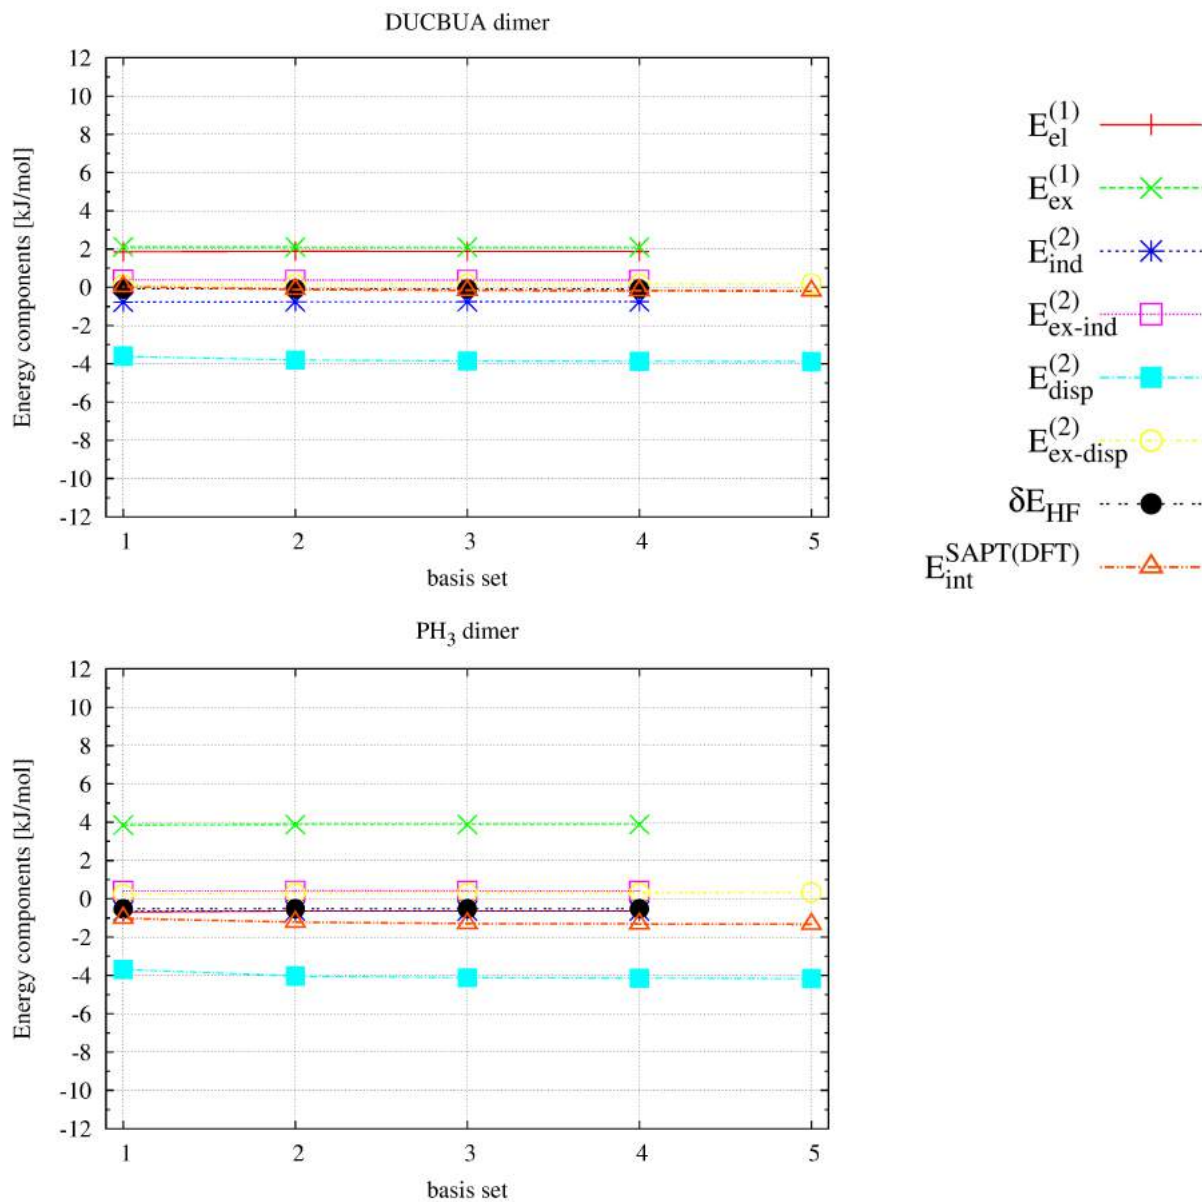

Figure S4: Dependences between components of the SAPT/CBS-based interaction energy and the P-H...H angle in the PH<sub>3</sub> dimer. The H...H distance was fixed at the optimized (MP2/aug-cc-pVTZ) value at 180° (2.367Å) and the two P-H units involved in the interaction were kept parallel to each other for all angles.

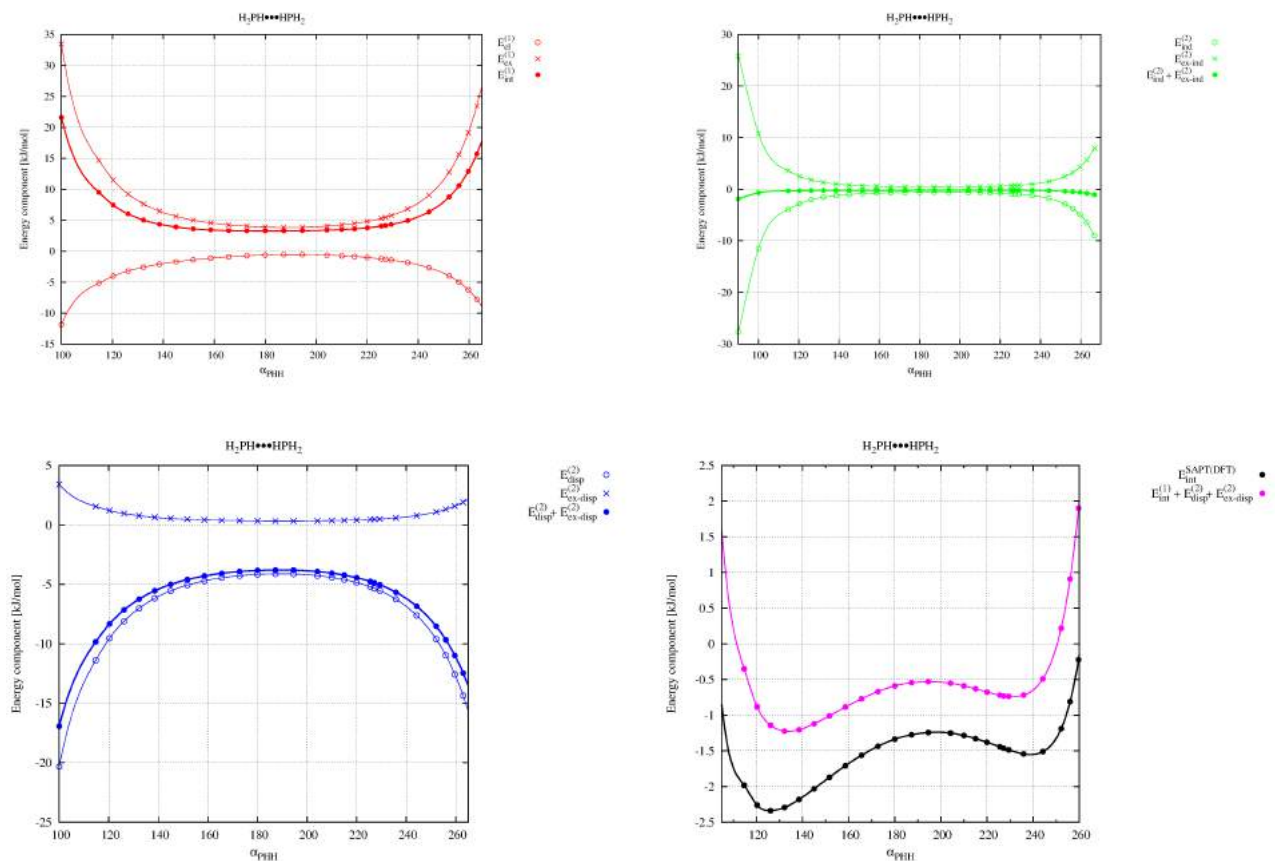

Figure S5: Dependence of the interaction energy on the electron density and DI(H,H).

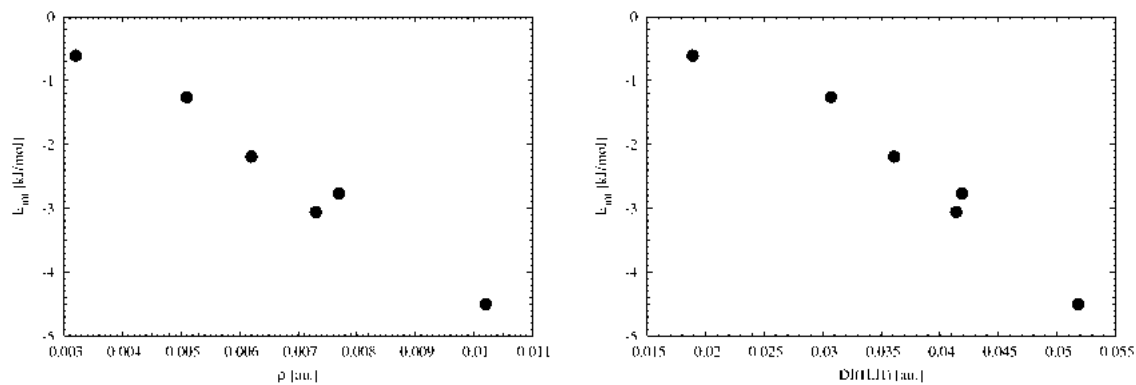

Table S1: SAPT(DFT)-based interaction energy components and interaction energies themselves (in kJ/mol) obtained by means of MP2, SCS-MP2, MP2C, and CCSD(T) methods and the aug-cc-pVXZ (X = D, T, Q, 5) basis sets and the CBS limit (X = 5).

| Dimer                               | $E_{\text{el}}^{(1)}$ | $E_{\text{ex}}^{(1)}$ | $E_{\text{ind}}^{(2)}$ | $E_{\text{ex-ind}}^{(2)}$ | $E_{\text{disp}}^{(2)}$ | $E_{\text{ex-disp}}^{(2)}$ | $\delta E_{\text{HF}}$ | $E_{\text{int}}^{\text{SAPT(DFT)}}$ | $E_{\text{int}}^{\text{MP2}}$ | $E_{\text{int}}^{\text{SCS-MP2}}$ | $E_{\text{int}}^{\text{MP2C}}$ | $E_{\text{int}}^{\text{CCSD(T)}}$ |
|-------------------------------------|-----------------------|-----------------------|------------------------|---------------------------|-------------------------|----------------------------|------------------------|-------------------------------------|-------------------------------|-----------------------------------|--------------------------------|-----------------------------------|
| aug-cc-pVDZ                         |                       |                       |                        |                           |                         |                            |                        |                                     |                               |                                   |                                |                                   |
| DUCBUA                              | 1.844                 | 2.105                 | -0.774                 | 0.390                     | -3.598                  | 0.150                      | -0.091                 | 0.026                               | -0.527                        | 0.341                             | 0.027                          |                                   |
| PH <sub>3</sub>                     | -0.679                | 3.847                 | -0.628                 | 0.408                     | -3.684                  | 0.255                      | -0.531                 | -1.013                              | -1.011                        | -0.229                            | -0.369                         | -1.030                            |
| PMeH <sub>2</sub>                   | -1.623                | 5.321                 | -0.882                 | 0.632                     | -4.975                  | 0.377                      | -0.727                 | -1.879                              | -1.890                        | -0.810                            | -1.035                         | -1.851                            |
| PMe <sub>2</sub> H                  | -2.452                | 7.069                 | -1.246                 | 0.954                     | -6.505                  | 0.526                      | -0.941                 | -2.596                              | -2.729                        | -1.298                            | -1.572                         | -2.578                            |
| P <sub>3</sub> H <sub>5</sub> -T    | -1.068                | 7.434                 | -1.560                 | 1.058                     | -6.846                  | 0.467                      | -1.036                 | -1.551                              | -2.359                        | -0.792                            | -0.766                         | -2.038                            |
| P <sub>3</sub> H <sub>5</sub> -C    | -1.746                | 10.945                | -2.576                 | 1.770                     | -9.731                  | 0.661                      | -1.625                 | -2.303                              | -3.870                        | -1.423                            | -1.014                         | -2.778                            |
| aug-cc-pVTZ                         |                       |                       |                        |                           |                         |                            |                        |                                     |                               |                                   |                                |                                   |
| DUCBUA                              | 1.876                 | 2.103                 | -0.765                 | 0.382                     | -3.793                  | 0.169                      | -0.088                 | -0.116                              | -0.614                        | 0.282                             | -0.131                         |                                   |
| PH <sub>3</sub>                     | -0.622                | 3.872                 | -0.641                 | 0.415                     | -4.028                  | 0.304                      | -0.528                 | -1.228                              | -1.258                        | -0.450                            | -0.688                         | -1.244                            |
| PMeH <sub>2</sub>                   | -1.577                | 5.352                 | -0.904                 | 0.650                     | -5.396                  | 0.444                      | -0.724                 | -2.155                              | -2.185                        | -1.080                            | -1.427                         | -2.137                            |
| PMe <sub>2</sub> H                  | -2.415                | 7.111                 | -1.292                 | 1.003                     | -7.011                  | 0.611                      | -0.937                 | -2.929                              | -3.064                        | -1.609                            | -2.034                         | -2.926                            |
| P <sub>3</sub> H <sub>5</sub> -T    | -0.992                | 7.468                 | -1.593                 | 1.086                     | -7.423                  | 0.548                      | -1.032                 | -1.939                              | -2.768                        | -1.151                            | -1.301                         | -2.387                            |
| P <sub>3</sub> H <sub>5</sub> -C    | -1.640                | 10.995                | -2.621                 | 1.809                     | -10.556                 | 0.775                      | -1.619                 | -2.859                              | -4.496                        | -1.968                            | -1.795                         | -3.349                            |
| aug-cc-pVQZ                         |                       |                       |                        |                           |                         |                            |                        |                                     |                               |                                   |                                |                                   |
| DUCBUA                              | 1.876                 | 2.102                 | -0.758                 | 0.378                     | -3.840                  | 0.177                      | -0.088                 | -0.153                              | -0.616                        | 0.279                             | -0.154                         |                                   |
| PH <sub>3</sub>                     | -0.635                | 3.876                 | -0.635                 | 0.411                     | -4.110                  | 0.321                      | -0.528                 | -1.301                              | -1.323                        | -0.514                            | -0.773                         |                                   |
| PMeH <sub>2</sub>                   | -1.578                | 5.358                 | -0.901                 | 0.649                     | -5.493                  | 0.465                      | -0.722                 | -2.223                              | -2.261                        | -1.158                            | -1.535                         |                                   |
| PMe <sub>2</sub> H                  | -2.410                | 7.120                 | -1.294                 | 1.008                     | -7.124                  | 0.639                      | -0.934                 | -2.997                              | -3.147                        | -1.700                            | -2.164                         |                                   |
| P <sub>3</sub> H <sub>5</sub> -T    | -1.018                | 7.478                 | -1.589                 | 1.086                     | -7.556                  | 0.575                      | -1.031                 | -2.056                              | -2.860                        | -1.241                            | -1.426                         |                                   |
| P <sub>3</sub> H <sub>5</sub> -C    | -1.665                | 11.019                | -2.616                 | 1.811                     | -10.748                 | 0.811                      | -1.616                 | -3.003                              | -4.635                        | -2.108                            | -1.978                         |                                   |
| aug-cc-pV5Z                         |                       |                       |                        |                           |                         |                            |                        |                                     |                               |                                   |                                |                                   |
| DUCBUA                              | 1.874                 | 2.102                 | -0.755                 | 0.378                     | -3.851                  | 0.180                      | -0.088                 | -0.160                              | -0.629                        | 0.278                             | -0.157                         |                                   |
| PH <sub>3</sub>                     | -0.637                | 3.881                 | -0.634                 | 0.412                     | -4.133                  | 0.327                      | -0.526                 | -1.309                              | -1.338                        | -0.531                            | -0.796                         |                                   |
| PMeH <sub>2</sub>                   | -1.576                | 5.366                 | -0.900                 | 0.651                     | -5.521                  | 0.474                      | -0.720                 | -2.227                              | -2.279                        | -1.180                            | -1.559                         |                                   |
| PMe <sub>2</sub> H                  | -2.406                | 7.131                 | -1.294                 | 1.010                     | -7.159                  | 0.649                      | -0.931                 | -3.000                              | -3.168                        | -1.726                            | -2.187                         |                                   |
| P <sub>3</sub> H <sub>5</sub> -T    | -1.027                | 7.488                 | -1.588                 | 1.089                     | -7.599                  | 0.585                      | -1.028                 | -2.080                              | -2.883                        | -1.268                            | -1.472                         |                                   |
| P <sub>3</sub> H <sub>5</sub> -C    | -1.674                | 11.042                | -2.617                 | 1.817                     | -10.811                 | 0.826                      | -1.611                 | -3.029                              | -4.671                        | -2.150                            | -2.044                         |                                   |
| aug-cc-pV5Z $\rightarrow$ CBS limit |                       |                       |                        |                           |                         |                            |                        |                                     |                               |                                   |                                |                                   |
| DUCBUA                              | 1.874                 | 2.102                 | -0.755                 | 0.378                     | -3.862                  | 0.183                      | -0.088                 | -0.168                              | -0.647                        | 0.276                             | -0.182                         |                                   |
| PH <sub>3</sub>                     | -0.637                | 3.881                 | -0.634                 | 0.412                     | -4.157                  | 0.333                      | -0.526                 | -1.328                              | -1.350                        | -0.546                            | -0.816                         |                                   |
| PMeH <sub>2</sub>                   | -1.576                | 5.366                 | -0.900                 | 0.651                     | -5.550                  | 0.483                      | -0.720                 | -2.246                              | -2.299                        | -1.205                            | -1.586                         |                                   |
| PMe <sub>2</sub> H                  | -2.406                | 7.131                 | -1.294                 | 1.010                     | -7.196                  | 0.659                      | -0.931                 | -3.027                              | -3.194                        | -1.758                            | -2.216                         |                                   |
| P <sub>3</sub> H <sub>5</sub> -T    | -1.027                | 7.488                 | -1.588                 | 1.089                     | -7.644                  | 0.595                      | -1.028                 | -2.115                              | -2.899                        | -1.288                            | -1.511                         |                                   |
| P <sub>3</sub> H <sub>5</sub> -C    | -1.674                | 11.042                | -2.617                 | 1.817                     | -10.877                 | 0.842                      | -1.611                 | -3.078                              | -4.708                        | -2.194                            | -2.114                         |                                   |

Table S2: SAPT(DFT)-based interaction energy components and interaction energies themselves (in kJ/mol) obtained by means of MP2, SCS-MP2, MP2C, and CCSD(T) methods and the aug-cc-pCVXZ (X = D, T, Q, 5) basis sets and the CBS limit (X = 5).

| Dimer                                | $E_{\text{el}}^{(1)}$ | $E_{\text{ex}}^{(1)}$ | $E_{\text{ind}}^{(2)}$ | $E_{\text{ex-ind}}^{(2)}$ | $E_{\text{disp}}^{(2)}$ | $E_{\text{ex-disp}}^{(2)}$ | $\delta E_{\text{HF}}$ | $E_{\text{int}}^{\text{SAPT(DFT)}}$ | $E_{\text{int}}^{\text{MP2}}$ | $E_{\text{int}}^{\text{SCS-MP2}}$ | $E_{\text{int}}^{\text{MP2C}}$ | $E_{\text{int}}^{\text{CCSD(T)}}$ |
|--------------------------------------|-----------------------|-----------------------|------------------------|---------------------------|-------------------------|----------------------------|------------------------|-------------------------------------|-------------------------------|-----------------------------------|--------------------------------|-----------------------------------|
| aug-cc-pCVDZ                         |                       |                       |                        |                           |                         |                            |                        |                                     |                               |                                   |                                |                                   |
| DUCBUA                               | 1.852                 | 2.106                 | -0.772                 | 0.388                     | -3.607                  | 0.151                      | -0.090                 | 0.027                               | -0.546                        | 0.328                             | 0.006                          |                                   |
| PH <sub>3</sub>                      | -0.690                | 3.849                 | -0.629                 | 0.408                     | -3.689                  | 0.256                      | -0.529                 | -1.023                              | -1.029                        | -0.243                            | -0.394                         | -1.043                            |
| PMeH <sub>2</sub>                    | -1.630                | 5.324                 | -0.883                 | 0.633                     | -4.983                  | 0.379                      | -0.724                 | -1.884                              | -1.905                        | -0.820                            | -1.061                         | -1.861                            |
| PMe <sub>2</sub> H                   | -2.458                | 7.073                 | -1.249                 | 0.957                     | -6.517                  | 0.529                      | -0.937                 | -2.602                              | -2.741                        | -1.305                            | -1.599                         | -2.587                            |
| P <sub>3</sub> H <sub>5</sub> -T     | -1.083                | 7.437                 | -1.562                 | 1.060                     | -6.860                  | 0.469                      | -1.032                 | -1.571                              | -2.405                        | -0.828                            | -0.817                         | -2.063                            |
| P <sub>3</sub> H <sub>5</sub> -C     | -1.760                | 10.950                | -2.579                 | 1.773                     | -9.756                  | 0.665                      | -1.619                 | -2.326                              | -3.937                        | -1.474                            | -1.082                         | -2.807                            |
| aug-cc-pCVTZ                         |                       |                       |                        |                           |                         |                            |                        |                                     |                               |                                   |                                |                                   |
| DUCBUA                               | 1.884                 | 2.101                 | -0.759                 | 0.378                     | -3.805                  | 0.170                      | -0.086                 | -0.116                              | -0.626                        | 0.276                             | -0.129                         |                                   |
| PH <sub>3</sub>                      | -0.626                | 3.878                 | -0.635                 | 0.411                     | -4.035                  | 0.306                      | -0.524                 | -1.225                              | -1.281                        | -0.468                            | -0.705                         |                                   |
| PMeH <sub>2</sub>                    | -1.575                | 5.361                 | -0.900                 | 0.648                     | -5.408                  | 0.447                      | -0.717                 | -2.144                              | -2.200                        | -1.089                            | -1.436                         |                                   |
| PMe <sub>2</sub> H                   | -2.408                | 7.123                 | -1.293                 | 1.006                     | -7.028                  | 0.617                      | -0.928                 | -2.911                              | -3.075                        | -1.615                            | -2.037                         |                                   |
| P <sub>3</sub> H <sub>5</sub> -T     | -1.014                | 7.479                 | -1.587                 | 1.084                     | -7.437                  | 0.552                      | -1.024                 | -1.947                              | -2.835                        | -1.203                            | -1.355                         |                                   |
| P <sub>3</sub> H <sub>5</sub> -C     | -1.660                | 11.023                | -2.614                 | 1.808                     | -10.590                 | 0.782                      | -1.605                 | -2.857                              | -4.599                        | -2.046                            | -1.865                         |                                   |
| aug-cc-pCVQZ                         |                       |                       |                        |                           |                         |                            |                        |                                     |                               |                                   |                                |                                   |
| DUCBUA                               | 1.879                 | 2.103                 | -0.756                 | 0.378                     | -3.857                  | 0.178                      | -0.086                 | -0.162                              | -0.649                        | 0.258                             | -0.170                         |                                   |
| PH <sub>3</sub>                      | -0.636                | 3.880                 | -0.632                 | 0.410                     | -4.118                  | 0.322                      | -0.524                 | -1.299                              | -1.353                        | -0.538                            | -0.798                         |                                   |
| PMeH <sub>2</sub>                    | -1.574                | 5.364                 | -0.898                 | 0.648                     | -5.508                  | 0.468                      | -0.718                 | -2.218                              | -2.292                        | -1.182                            | -1.557                         |                                   |
| PMe <sub>2</sub> H                   | -2.403                | 7.128                 | -1.291                 | 1.000                     | -7.146                  | 0.643                      | -0.928                 | -2.991                              | -3.184                        | -1.727                            | -2.185                         |                                   |
| P <sub>3</sub> H <sub>5</sub> -T     | -1.028                | 7.486                 | -1.584                 | 1.084                     | -7.571                  | 0.578                      | -1.024                 | -2.060                              | -2.944                        | -1.306                            | -1.493                         |                                   |
| P <sub>3</sub> H <sub>5</sub> -C     | -1.671                | 11.038                | -2.613                 | 1.809                     | -10.786                 | 0.818                      | -1.605                 | -3.010                              | -4.774                        | -2.216                            | -2.076                         |                                   |
| aug-cc-pCV5Z                         |                       |                       |                        |                           |                         |                            |                        |                                     |                               |                                   |                                |                                   |
| DUCBUA                               | 1.875                 | 2.102                 | -0.755                 | 0.377                     | -3.872                  | 0.181                      | -0.086                 | -0.178                              | -0.653                        | 0.256                             | -0.183                         |                                   |
| PH <sub>3</sub>                      | -0.638                | 3.882                 | -0.632                 | 0.410                     | -4.143                  | 0.328                      | -0.524                 | -1.318                              | -1.376                        | -0.561                            | -0.821                         |                                   |
| PMeH <sub>2</sub>                    | -1.576                | 5.367                 | -0.899                 | 0.648                     | -5.540                  | 0.476                      | -0.718                 | -2.242                              | -2.326                        | -1.218                            | 1.587                          |                                   |
| PMe <sub>2</sub> H                   | -2.405                | 7.135                 | -1.293                 | 1.007                     | -7.186                  | 0.654                      | -0.927                 | -3.017                              | -3.226                        | -1.773                            | -2.219                         |                                   |
| P <sub>3</sub> H <sub>5</sub> -T     | -1.031                | 7.488                 | -1.585                 | 1.084                     | -7.615                  | 0.587                      | -1.024                 | -2.096                              | -2.980                        | -1.344                            | -1.532                         |                                   |
| P <sub>3</sub> H <sub>5</sub> -C     | -1.677                | 11.044                | -2.613                 | 1.810                     | -10.853                 | 0.832                      | -1.606                 | -3.063                              | -4.842                        | -2.285                            | -2.148                         |                                   |
| aug-cc-pCV5Z $\rightarrow$ CBS limit |                       |                       |                        |                           |                         |                            |                        |                                     |                               |                                   |                                |                                   |
| DUCBUA                               | 1.875                 | 2.102                 | -0.755                 | 0.377                     | -3.888                  | 0.184                      | -0.086                 | -0.191                              | -0.656                        | 0.255                             | -0.189                         |                                   |
| PH <sub>3</sub>                      | -0.638                | 3.882                 | -0.632                 | 0.410                     | -4.169                  | 0.334                      | -0.524                 | -1.337                              | -1.398                        | -0.584                            | -0.842                         |                                   |
| PMeH <sub>2</sub>                    | -1.576                | 5.367                 | -0.899                 | 0.648                     | -5.574                  | 0.484                      | -0.718                 | -2.268                              | -2.359                        | -1.253                            | -1.616                         |                                   |
| PMe <sub>2</sub> H                   | -2.405                | 7.135                 | -1.293                 | 1.007                     | -7.228                  | 0.665                      | -0.927                 | -3.046                              | -3.269                        | -1.820                            | -2.252                         |                                   |
| P <sub>3</sub> H <sub>5</sub> -T     | -1.031                | 7.488                 | -1.585                 | 1.084                     | -7.661                  | 0.596                      | -1.024                 | -2.133                              | -3.016                        | -1.380                            | -1.571                         |                                   |
| P <sub>3</sub> H <sub>5</sub> -C     | -1.677                | 11.044                | -2.613                 | 1.810                     | -10.923                 | 0.847                      | -1.606                 | -3.118                              | -4.909                        | -2.353                            | -2.217                         |                                   |

Table S3: Differences between values of SAPT(DFT)-based interaction energy components and MP2, SCS-MP2, MP2C, and CCSD(T) supermolecular interaction energies (in kJ/mol) obtained by means of no-core and core correlation approaches.

| Dimer                            | $E_{\text{elst}}^{(1)}$ | $E_{\text{exch}}^{(1)}$ | $E_{\text{ind}}^{(2)}$ | $E_{\text{exch-ind}}^{(2)}$ | $E_{\text{disp}}^{(2)}$ | $E_{\text{exch-disp}}^{(2)}$ | $\delta E_{\text{HF}}$ | $E_{\text{int}}^{\text{SAPT}}$ | $E_{\text{int}}^{\text{MP2}}$ | $E_{\text{int}}^{\text{SCS-MP2}}$ | $E_{\text{int}}^{\text{MP2C}}$ | $E_{\text{int}}^{\text{CCSD(T)}}$ |
|----------------------------------|-------------------------|-------------------------|------------------------|-----------------------------|-------------------------|------------------------------|------------------------|--------------------------------|-------------------------------|-----------------------------------|--------------------------------|-----------------------------------|
| aug-cc-pVDZ vs aug-cc-pCVDZ      |                         |                         |                        |                             |                         |                              |                        |                                |                               |                                   |                                |                                   |
| DUCBUA                           | 0.008                   | 0.001                   | 0.002                  | 0.002                       | 0.009                   | 0.001                        | 0.001                  | 0.001                          | 0.019                         | 0.013                             | 0.021                          |                                   |
| PH <sub>3</sub>                  | 0.011                   | 0.002                   | 0.001                  | 0.000                       | 0.005                   | 0.001                        | 0.002                  | 0.010                          | 0.018                         | 0.014                             | 0.025                          | 0.013                             |
| PMeH <sub>2</sub>                | 0.007                   | 0.003                   | 0.001                  | 0.001                       | 0.008                   | 0.002                        | 0.003                  | 0.005                          | 0.015                         | 0.010                             | 0.026                          | 0.010                             |
| PMe <sub>2</sub> H               | 0.006                   | 0.004                   | 0.003                  | 0.003                       | 0.012                   | 0.003                        | 0.004                  | 0.006                          | 0.012                         | 0.007                             | 0.027                          | 0.009                             |
| P <sub>3</sub> H <sub>5</sub> -T | 0.015                   | 0.003                   | 0.002                  | 0.002                       | 0.014                   | 0.002                        | 0.004                  | 0.020                          | 0.046                         | 0.036                             | 0.051                          | 0.025                             |
| P <sub>3</sub> H <sub>5</sub> -C | 0.014                   | 0.005                   | 0.003                  | 0.003                       | 0.025                   | 0.004                        | 0.006                  | 0.023                          | 0.067                         | 0.051                             | 0.068                          | 0.029                             |
| CBS limit vs CBS limit (core)    |                         |                         |                        |                             |                         |                              |                        |                                |                               |                                   |                                |                                   |
| DUCBUA                           | 0.001                   | 0.000                   | 0.000                  | 0.001                       | 0.026                   | 0.001                        | 0.002                  | 0.023                          | 0.009                         | 0.021                             | 0.007                          |                                   |
| PH <sub>3</sub>                  | 0.001                   | 0.001                   | 0.002                  | 0.002                       | 0.012                   | 0.001                        | 0.002                  | 0.009                          | 0.048                         | 0.038                             | 0.026                          |                                   |
| PMeH <sub>2</sub>                | 0.000                   | 0.001                   | 0.001                  | 0.003                       | 0.024                   | 0.001                        | 0.002                  | 0.022                          | 0.060                         | 0.048                             | 0.030                          |                                   |
| PMe <sub>2</sub> H               | 0.001                   | 0.004                   | 0.001                  | 0.003                       | 0.032                   | 0.006                        | 0.004                  | 0.019                          | 0.075                         | 0.062                             | 0.036                          |                                   |
| P <sub>3</sub> H <sub>5</sub> -T | 0.004                   | 0.000                   | 0.003                  | 0.005                       | 0.017                   | 0.001                        | 0.004                  | 0.018                          | 0.117                         | 0.092                             | 0.060                          |                                   |
| P <sub>3</sub> H <sub>5</sub> -C | 0.003                   | 0.002                   | 0.004                  | 0.007                       | 0.046                   | 0.005                        | 0.005                  | 0.040                          | 0.201                         | 0.159                             | 0.103                          |                                   |

Table S4: Cartesian coordinates of the fully optimized dimer of  $\text{PH}_2\text{CH}_3$ .

|   |           |           |           |
|---|-----------|-----------|-----------|
| p | -0.205110 | -0.202463 | -0.418447 |
| p | 4.128665  | -0.413433 | -1.815538 |
| c | 1.102377  | 0.284897  | 0.807012  |
| h | 0.643844  | -0.831565 | -1.358922 |
| h | -0.247831 | 1.011340  | -1.143154 |
| h | 3.101053  | -1.180540 | -1.218423 |
| c | 3.048383  | 0.874815  | -2.604334 |
| h | 4.416197  | 0.285960  | -0.620332 |
| h | 0.662430  | 0.976189  | 1.523985  |
| h | 1.415081  | -0.605464 | 1.350125  |
| h | 1.974577  | 0.744973  | 0.349956  |
| h | 3.681143  | 1.690355  | -2.950743 |
| h | 2.565333  | 0.433919  | -3.474834 |
| h | 2.285333  | 1.267747  | -1.937504 |

Table S5: Cartesian coordinates of the fully optimized dimer of  $\text{PH}(\text{CH}_3)_2$ .

|   |           |           |           |
|---|-----------|-----------|-----------|
| p | -0.207332 | -0.517728 | -0.416433 |
| p | 4.056434  | -0.682521 | -1.961446 |
| c | 1.119184  | 0.019631  | 0.758120  |
| h | 0.644690  | -0.874631 | -1.488743 |
| c | -0.712597 | 1.140230  | -1.068081 |
| h | 3.082923  | -1.276208 | -1.123007 |
| c | 2.966291  | 0.629662  | -2.680986 |
| c | 4.901834  | 0.321095  | -0.654994 |
| h | 0.647246  | 0.495721  | 1.617554  |
| h | 1.667396  | -0.851431 | 1.114821  |
| h | 1.817704  | 0.721187  | 0.303273  |
| h | 3.587106  | 1.318469  | -3.253827 |
| h | 2.248795  | 0.176041  | -3.363591 |
| h | 2.428907  | 1.189043  | -1.915931 |
| h | -1.269602 | 1.662516  | -0.290618 |
| h | 0.140199  | 1.749857  | -1.364259 |
| h | -1.374010 | 1.009016  | -1.923409 |
| h | 5.611309  | 0.991861  | -1.138939 |
| h | 4.202305  | 0.910782  | -0.063762 |
| h | 5.462094  | -0.339194 | 0.005610  |
